# Supplementary material for: Transcriptional Profiling of Foam Cells Reveals Induction of Guanylate‐Binding Proteins Following Western Diet Acceleration of Atherosclerosis in the Absence of Global Changes in Inflammation
Source: PubMed Central journal article supplement — J Am Heart Assoc. 2016 Apr 18;5(4):e002663. doi: 10.1161/JAHA.115.002663 (PMC4859273; doi:10.1161/jaha.115.002663), 2016-04-18
Supplement: JAH3-5-e002663-s001.pdf [file JAH3-5-e002663-s001.pdf]

## SUPPLEMENTAL MATERIAL

**Table S1.** Genes differentially expressed in foam cells of mice fed WD for 2 weeks with respect to mice fed regular chow through the entire study.

| Affymetrix Probe ID | Fold Change | Gene Symbol        | Gene Name                                                   |
|---------------------|-------------|--------------------|-------------------------------------------------------------|
| 1448859_at          | 4.38        | Cxcl13             | chemokine (C-X-C motif) ligand 13                           |
| 1439276_at          | 3.89        | Adar               | adenosine deaminase, RNA-specific                           |
| 1424436_at          | 3.60        | Gart               | phosphoribosylglycinamide formyltransferase                 |
| 1431028_a_at        | 3.56        | Pank1              | pantothenate kinase 1                                       |
| 1431544_at          | 2.85        | 4930524B17Rik      |                                                             |
| 1451381_at          | 2.76        | 1810020D17Rik      | RIKEN cDNA 1810020D17 gene                                  |
| 1421290_at          | 2.62        | Hspb7              | heat shock protein family, member 7                         |
| 1444328_at          | 2.37        | Clta               | chlathrin, light polypeptide                                |
| 1424713_at          | 2.06        | Calml4             | calmodulin-like 4                                           |
| 1424428_at          | 2.05        | Ino80e             | INO80 complex subunit E                                     |
| 1453320_at          | 2.04        | 1700027A23Rik      | RIKEN cDNA 1700027A23 gene                                  |
| 1448104_at          | 1.69        | Aldh6a1            | aldehyde dehydrogenase family 6, subfamily A1               |
| 1420691_at          | 1.49        | Il2ra              | interleukin 2 receptor, alpha chain                         |
| 1442004_at          | 1.40        | Trim65             | tripartite motif-containing 65                              |
| 1435091_at          | 1.39        | Zfp568             | zinc finger protein 568                                     |
| 1434251_at          | -1.32       | Cnot1              | CCR4-NOT transcription complex, subunit 1                   |
| 1426446_at          | -1.39       | 6430548M08Rik      | RIKEN cDNA 6430548M08 gene                                  |
| 1431420_s_at        | -1.47       | Preli1             | PRELI domain containing 1                                   |
| 1428760_at          | -1.54       | Snopc3             | small nuclear RNA activating complex, polypeptide 3         |
| 1433621_at          | -1.60       | Wdr41              | WD repeat domain 41                                         |
| 1417226_at          | -1.62       | Fbxw4              | F-box and WD-40 domain protein 4                            |
| 1421888_x_at        | -1.76       | Aplp2              | amyloid beta (A4) precursor-like protein 2                  |
| 1440168_x_at        | -1.82       | Kctd7              | potassium channel tetramerisation domain containing 7       |
| 1415911_at          | -1.85       | Impact             | imprinted and ancient                                       |
| 1431716_at          | -1.92       | Herc4              | hect domain and RLD 4                                       |
| 1435867_at          | -1.92       | Jhdm1d             | jumonji C domain-containing histone demethylase 1 homolog D |
| 1418971_x_at        | -1.98       | Bcl10              | B-cell leukemia/lymphoma 10                                 |
| 1423899_at          | -1.99       | Trip12             | thyroid hormone receptor interactor 12                      |
| 1434660_at          | -2.01       | Alkbh1             | alkB, alkylation repair homolog 1                           |
| 1437361_at          | -2.01       | OTTMUSG00000002043 | predicted gene, OTTMUSG00000002043                          |
| 1450905_at          | -2.06       | Plxnc1             | plexin C1                                                   |
| 1423066_at          | -2.07       | Dnmt3a             | DNA methyltransferase 3A                                    |
| 1452769_at          | -2.07       | Rnf145             | ring finger protein 145                                     |
| 1417622_at          | -2.08       | Slc12a2            | solute carrier family 12, member 2                          |
| 1426227_s_at        | -2.17       | Vps37c             | vacuolar protein sorting 37C                                |
| 1449347_a_at        | -2.24       | Xlr4c              | X-linked lymphocyte-regulated 4B                            |

|              |       |               |                                                        |
|--------------|-------|---------------|--------------------------------------------------------|
| 1437087_at   | -2.29 | 2210408K08Rik |                                                        |
| 1424129_at   | -2.32 | Mfsd1         | major facilitator superfamily domain containing 1      |
| 1436157_at   | -2.34 | Ccar1         | cell division cycle and apoptosis regulator 1          |
| 1448568_a_at | -2.49 | Slc20a1       | solute carrier family 20, member 1                     |
| 1423569_at   | -2.59 | Gatm          | glycine amidinotransferase                             |
| 1416324_s_at | -2.85 | Kctd20        | potassium channel tetramerisation domain containing 20 |
| 1460243_at   | -2.87 | Sptlc2        | serine palmitoyltransferase, long chain base subunit 2 |
| 1439251_at   | -2.87 | 100042616     | predicted gene, 100042616                              |
| 1435390_at   | -3.08 | Exod1         | exonuclease domain containing 1                        |
| 1426894_s_at | -3.18 | Fam102a       | family with sequence similarity 102, member A          |
| 1451798_at   | -3.35 | Il1rn         | interleukin 1 receptor antagonist                      |
| 1449363_at   | -3.38 | Atf3          | activating transcription factor 3                      |
| 1448883_at   | -3.40 | Lgmn          | legumain                                               |
| 1440342_at   | -4.27 | G530011O06Rik |                                                        |
| 1422650_a_at | -4.90 | Riok3         | RIO kinase 3 (yeast)                                   |
| 1435539_at   | -6.28 | N/A           | N/A                                                    |

**Table S2.** Genes differentially expressed in foam cells of mice fed WD for 14 weeks with respect to mice fed regular chow through the entire study.

| Affymetrix Probe ID | Fold Change | Gene Symbol   | Gene Name                                                                           |
|---------------------|-------------|---------------|-------------------------------------------------------------------------------------|
| 1457566_at          | 12.40       | Zfp677        | zinc finger protein 677                                                             |
| 1428600_at          | 6.53        | Nin           | ninein                                                                              |
| 1435422_at          | 5.85        | 4933433P14Rik | RIKEN cDNA 4933433P14 gene                                                          |
| 1439363_at          | 5.63        | 1200014J11Rik | RIKEN cDNA 1200014J11 gene                                                          |
| 1438676_at          | 5.28        | Mpa2l         | macrophage activation 2 like                                                        |
| 1452833_at          | 4.67        | Rapgef2       | Rap guanine nucleotide exchange factor (GEF) 2                                      |
| 1422492_at          | 4.54        | Cpox          | coproporphyrinogen oxidase                                                          |
| 1438643_at          | 4.28        | Camk1d        | calcium/calmodulin-dependent protein kinase ID                                      |
| 1439276_at          | 4.27        | Adar          | adenosine deaminase, RNA-specific                                                   |
| 1445702_x_at        | 4.07        | Ppapdc2       | phosphatidic acid phosphatase type 2 domain containing 2                            |
| 1452960_at          | 4.07        | Scyl3         | SCY1-like 3                                                                         |
| 1452232_at          | 4.03        | Galnt7        | UDP-N-acetyl-alpha-D-galactosamine: polypeptide N-acetylgalactosaminyltransferase 7 |
| 1416866_at          | 3.99        | Bet1          | blocked early in transport 1 homolog                                                |
| 1425327_at          | 3.98        | Fam76a        | family with sequence similarity 76, member A                                        |
| 1427990_at          | 3.96        | Usp45         | ubiquitin specific petidase 45                                                      |
| 1460389_at          | 3.88        | Cdk8          | cyclin-dependent kinase 8                                                           |
| 1427938_at          | 3.85        | Mycbp         | c-myc binding protein                                                               |
| 1436736_x_at        | 3.84        | D0H4S114      | DNA segment, human D4S114                                                           |
| 1423408_a_at        | 3.80        | 2500003M10Rik | RIKEN cDNA 2500003M10 gene                                                          |
| 1435164_s_at        | 3.80        | Uba3          | ubiquitin-like modifier activating enzyme 3                                         |
| 1456060_at          | 3.75        | Maf           | avian musculoaponeurotic fibrosarcoma (v-maf) AS42 oncogene homolog                 |
| 1460391_at          | 3.73        | Ola1          | Obg-like ATPase 1                                                                   |
| 1452593_a_at        | 3.72        | Tceb1         | transcription elongation factor B (SIII), polypeptide 1                             |
| 1429519_at          | 3.68        | Fpgt          | fucose-1-phosphate guanylyltransferase                                              |
| 1424436_at          | 3.68        | Gart          | phosphoribosylglycinamide formyltransferase                                         |
| 1433730_at          | 3.68        | Elmod2        | ELMO domain containing 2                                                            |
| 1437901_a_at        | 3.65        | Vps41         | vacuolar protein sorting 41                                                         |
| 1451572_a_at        | 3.60        | Mff           | mitochondrial fission factor                                                        |
| 1456319_at          | 3.60        | N/A           | N/A                                                                                 |
| 1436048_at          | 3.58        | Exoc8         | exocyst complex component 8                                                         |
| 1424360_at          | 3.56        | BC019943      |                                                                                     |
| 1435694_at          | 3.53        | Arhgap26      | Rho GTPase activating protein 26                                                    |
| 1428453_at          | 3.47        | Nat12         | N-acetyltransferase 12                                                              |
| 1426669_at          | 3.43        | Cpped1        | Vcalcineurin-like phosphoesterase domain containing 1                               |
| 1452047_at          | 3.43        | Cacybp        | calcyclin binding protein                                                           |
| 1434853_x_at        | 3.38        | Mkrrn1        | makorin, ring finger protein, 1                                                     |
| 1424099_at          | 3.38        | Gpx8          | glutathione peroxidase 8                                                            |

|              |      |               |                                                                       |
|--------------|------|---------------|-----------------------------------------------------------------------|
| 1453071_s_at | 3.35 | Kdelc2        | KDEL (Lys-Asp-Glu-Leu) containing 2                                   |
| 1427131_s_at | 3.35 | Lrrc58        | leucine rich repeat containing 58                                     |
| 1454136_a_at | 3.32 | 4921524J17Rik | RIKEN cDNA 4921524J17 gene                                            |
| 1434328_at   | 3.27 | Rpl15         | ribosomal protein L15                                                 |
| 1426205_at   | 3.24 | Ppp1cb        | protein phosphatase 1, catalytic subunit, beta isoform                |
| 1436221_at   | 3.21 | Ildr2         | immunoglobulin-like domain containing receptor 2                      |
| 1428853_at   | 3.21 | Ptch1         | patched homolog 1                                                     |
| 1418392_a_at | 3.20 | Gbp3          | guanylate binding protein 3                                           |
| 1454694_a_at | 3.20 | Top2a         | topoisomerase (DNA) II alpha                                          |
| 1434070_at   | 3.19 | Jag1          | jagged 1                                                              |
| 1458679_a_at | 3.19 | Tatdn1        | TatD DNase domain containing 1                                        |
| 1428162_at   | 3.19 | 4933421E11Rik | RIKEN cDNA 4933421E11 gene                                            |
| 1456236_s_at | 3.18 | Commd10       | COMM domain containing 10                                             |
| 1426222_s_at | 3.18 | Vwa5a         | von Willebrand factor A domain containing 5A                          |
| 1416988_at   | 3.17 | Msh2          | mutS homolog 2                                                        |
| 1429454_at   | 3.14 | Gapvd1        | GTPase activating protein and VPS9 domains 1                          |
| 1454689_at   | 3.13 | Srrm1         | serine/arginine repetitive matrix 1                                   |
| 1418372_at   | 3.10 | Adsl          | adenylosuccinate lyase                                                |
| 1448794_s_at | 3.06 | Dnajc2        | DnaJ (Hsp40) homolog, subfamily C, member 2                           |
| 1417974_at   | 3.06 | Kpna4         | karyopherin (importin) alpha 4                                        |
| 1433585_at   | 3.04 | Tnpo1         | Transportin 1                                                         |
| 1443208_at   | 3.04 | LOC100044979  | G protein-coupled receptor 137B                                       |
| 1429201_at   | 3.01 | Cyld          | cylindromatosis (turban tumor syndrome)                               |
| 1437276_at   | 3.00 | N/A           | N/A                                                                   |
| 1431930_x_at | 2.97 | Cr1s1         | cardiolipin synthase 1                                                |
| 1449056_at   | 2.97 | E330009J07Rik | RIKEN cDNA E330009J07 gene                                            |
| 1434513_at   | 2.94 | Atp13a3       | ATPase type 13A3                                                      |
| 1429508_at   | 2.93 | 2310057M21Rik | RIKEN cDNA 2310057M21 gene                                            |
| 1421968_a_at | 2.90 | Nipa2         | non imprinted in Prader-Willi/Angelman syndrome 2 homolog             |
| 1419076_a_at | 2.90 | Brca2         | breast cancer 2                                                       |
| 1435789_x_at | 2.90 | N/A           | N/A                                                                   |
| 1434336_s_at | 2.90 | Rcor1         | REST corepressor 1                                                    |
| 1428681_at   | 2.89 | Gm608         | gene model 608, (NCBI)                                                |
| 1449039_a_at | 2.88 | Hnrpd1        | heterogeneous nuclear ribonucleoprotein D-like                        |
| 1428407_at   | 2.87 | Hnrnpa0       | heterogeneous nuclear ribonucleoprotein A0                            |
| 1422553_at   | 2.83 | Pten          | phosphatase and tensin homolog                                        |
| 1452635_x_at | 2.82 | Taf1d         | TATA box binding protein (Tbp)-associated factor, RNA polymerase I, D |
| 1444139_at   | 2.80 | Ddit4l        | DNA-damage-inducible transcript 4-like                                |
| 1419759_at   | 2.79 | Abcb1a        | ATP-binding cassette, sub-family B (MDR/TAP), member 1A               |
| 1424358_at   | 2.79 | Ube2e2        | ubiquitin-conjugating enzyme E2E 2                                    |
| 1442785_at   | 2.79 | A130004G11Rik | RIKEN cDNA A130004G11 gene                                            |
| 1455024_at   | 2.79 | Tlk1          | tousled-like kinase 1                                                 |
| 1449670_x_at | 2.79 | LOC100044979  | G protein-coupled receptor 137B                                       |
| 1416614_at   | 2.77 | Eid1          | EP300 interacting inhibitor of differentiation 1                      |
| 1457024_x_at | 2.77 | Slc35a2       | solute carrier family 35 (UDP-galactose transporter), member          |

| A2           |      |               |                                                                                           |
|--------------|------|---------------|-------------------------------------------------------------------------------------------|
| 1419495_at   | 2.76 | Immp2l        | IMP2 inner mitochondrial membrane peptidase-like                                          |
| 1454846_at   | 2.76 | Utp15         | UTP15, U3 small nucleolar ribonucleoprotein, homolog                                      |
| 1455483_at   | 2.75 | Zfp148        | zinc finger protein 148                                                                   |
| 1454831_at   | 2.75 | Foxn2         | forkhead box N2                                                                           |
| 1418988_at   | 2.75 | Pex7          | peroxisomal biogenesis factor 7                                                           |
| 1451649_a_at | 2.74 | Wdr75         | WD repeat domain 75                                                                       |
| 1455513_at   | 2.74 | Taf1          | TAF1 RNA polymerase II, TATA box binding protein (TBP)-associated factor                  |
| 1424156_at   | 2.73 | Rbl1          | retinoblastoma-like 1 (p107)                                                              |
| 1415863_at   | 2.73 | Eif4g2        | eukaryotic translation initiation factor 4, gamma 2                                       |
| 1429438_at   | 2.72 | Bcor          | BCL6 interacting corepressor                                                              |
| 1440187_at   | 2.71 | Taf3          | TAF3 RNA polymerase II, TATA box binding protein (TBP)-associated factor                  |
| 1424495_a_at | 2.70 | Cklf          | chemokine-like factor                                                                     |
| 1429043_at   | 2.70 | Smndc1        | survival motor neuron domain containing 1                                                 |
| 1429796_at   | 2.70 | Kalrn         | kalirin, RhoGEF kinase                                                                    |
| 1442757_at   | 2.70 | Lrch1         | leucine-rich repeats and calponin homology (CH) domain containing 1                       |
| 1416860_s_at | 2.70 | Ing1          | inhibitor of growth family, member 1                                                      |
| 1415890_at   | 2.69 | Papss1        | 3'-phosphoadenosine 5'-phosphosulfate synthase 1                                          |
| 1451641_at   | 2.68 | Dbr1          | debranching enzyme homolog 1                                                              |
| 1415791_at   | 2.67 | Rnf34         | ring finger protein 34                                                                    |
| 1449175_at   | 2.66 | Gpr65         | G-protein coupled receptor 65                                                             |
| 1428087_at   | 2.64 | Dnm1l         | dynamamin 1-like                                                                          |
| 1435821_s_at | 2.63 | Ppp1r8        | protein phosphatase 1, regulatory (inhibitor) subunit 8                                   |
| 1417770_s_at | 2.63 | Psmc6         | proteasome (prosome, macropain) 26S subunit, ATPase, 6                                    |
| 1422857_at   | 2.63 | Trip4         | thyroid hormone receptor interactor 4                                                     |
| 1439994_at   | 2.63 | 1810013D10Rik | RIKEN cDNA 1810013D10 gene                                                                |
| 1454998_at   | 2.63 | 1200011118Rik |                                                                                           |
| 1451374_x_at | 2.63 | Cklf          | chemokine-like factor                                                                     |
| 1415737_at   | 2.62 | Rfk           | riboflavin kinase                                                                         |
| 1451745_a_at | 2.62 | Znhit1        | zinc finger, HIT domain containing 1                                                      |
| 1434418_at   | 2.62 | Cers6         | ceramide synthase 6                                                                       |
| 1426977_at   | 2.60 | Usp47         | ubiquitin specific peptidase 47                                                           |
| 1438055_at   | 2.60 | Rarres1       | retinoic acid receptor responder (tazarotene induced) 1                                   |
| 1454938_at   | 2.59 | Snx13         | sorting nexin 13                                                                          |
| 1456886_at   | 2.59 | N/A           | N/A                                                                                       |
| 1451000_at   | 2.59 | Tmem126a      | transmembrane protein 126A                                                                |
| 1416653_at   | 2.58 | Stxbp3a       | syntaxin binding protein 3A                                                               |
| 1448234_at   | 2.55 | Dnajb6        | DnaJ (Hsp40) homolog, subfamily B, member 6                                               |
| 1435901_at   | 2.55 | Usp40         | ubiquitin specific peptidase 40                                                           |
| 1424782_at   | 2.55 | Tmem77        | transmembrane protein 77                                                                  |
| 1428552_at   | 2.54 | 2610001J05Rik | RIKEN cDNA 2610001J05 gene                                                                |
| 1450012_x_at | 2.53 | Ywhag         | tyrosine 3-monooxygenase/tryptophan 5-monooxygenase activation protein, gamma polypeptide |
| 1418180_at   | 2.53 | Sp1           | trans-acting transcription factor 1                                                       |

|              |      |          |                                                                                    |
|--------------|------|----------|------------------------------------------------------------------------------------|
| 1416952_at   | 2.53 | Atp6v1d  | ATPase, H <sup>+</sup> transporting, lysosomal V1 subunit D                        |
| 1448589_at   | 2.53 | Ndufb5   | NADH dehydrogenase (ubiquinone) 1 beta subcomplex, 5                               |
| 1459657_s_at | 2.53 | Polr1d   | predicted gene, OTTMUSG00000008305                                                 |
| 1417564_at   | 2.53 | Med7     | mediator complex subunit 7                                                         |
| 1444328_at   | 2.52 | Clta     | clathrin light chain 3                                                             |
| 1429559_at   | 2.52 | Gnaq     | guanine nucleotide binding protein, alpha q polypeptide                            |
| 1423707_at   | 2.52 | Tmem50b  | transmembrane protein 50B                                                          |
| 1417507_at   | 2.51 | Cyb561   | cytochrome b-561                                                                   |
| 1455915_at   | 2.51 | Galnt4   | UDP-N-acetyl-alpha-D-galactosamine:polypeptide N-acetylgalactosaminyltransferase 4 |
| 1452130_at   | 2.50 | Txndc14  | thioredoxin domain containing 14                                                   |
| 1425074_at   | 2.49 | Wrn      | Werner syndrome homolog                                                            |
| 1417594_at   | 2.49 | Gkap1    | G kinase anchoring protein 1                                                       |
| 1452152_at   | 2.48 | Clint1   | clathrin interactor 1                                                              |
| 1435093_at   | 2.48 | Zfyve20  | zinc finger, FYVE domain containing 20                                             |
| 1440310_at   | 2.47 | Runx1t1  | runt-related transcription factor 1; translocated to, 1 (cyclin D-related)         |
| 1441315_s_at | 2.47 | Slc19a2  | solute carrier family 19 (thiamine transporter), member 2                          |
| 1436796_at   | 2.47 | Matr3    | matrin 3                                                                           |
| 1451195_a_at | 2.46 | Tmx1     | thioredoxin-related transmembrane protein 1                                        |
| 1436272_at   | 2.45 | Rab3gap2 | RAB3 GTPase activating protein subunit 2                                           |
| 1436945_x_at | 2.45 | Stim1    | stromal interaction molecule 1                                                     |
| 1435754_at   | 2.45 | Zyg11b   | zyg-11 homolog B                                                                   |
| 1419208_at   | 2.45 | Map3k8   | mitogen-activated protein kinase kinase kinase 8                                   |
| 1426842_at   | 2.45 | Ythdf3   | YTH domain family 3                                                                |
| 1417365_a_at | 2.43 | Calm1    | calmodulin 1                                                                       |
| 1435284_at   | 2.43 | Rtn4     | reticulon-4                                                                        |
| 1447776_x_at | 2.43 | Rab6     | RAB6, member RAS oncogene family                                                   |
| 1434389_at   | 2.43 | Sos1     | son of sevenless homolog 1                                                         |
| 1415963_at   | 2.42 | Hnrnp2   | heterogeneous nuclear ribonucleoprotein H2                                         |
| 1438306_at   | 2.42 | Rnf180   | ring finger protein 180                                                            |
| 1419453_at   | 2.41 | Uchl5    | ubiquitin carboxyl-terminal esterase L5                                            |
| 1422748_at   | 2.41 | Zeb2     | zinc finger E-box binding homeobox 2                                               |
| 1429436_at   | 2.40 | Prpf40a  | pre-mRNA processing factor 40 homolog A                                            |
| 1455252_at   | 2.39 | Tsc1     | tuberous sclerosis 1                                                               |
| 1423994_at   | 2.38 | Kif1b    | kinesin family member 1B                                                           |
| 1455505_at   | 2.37 | Gatad2a  | GATA zinc finger domain containing 2A                                              |
| 1416009_at   | 2.35 | Tspan3   | tetraspanin 3                                                                      |
| 1454602_s_at | 2.34 | Cnot2    | CCR4-NOT transcription complex, subunit 2                                          |
| 1455658_at   | 2.33 | Cggbp1   | CGG triplet repeat binding protein 1                                               |
| 1448733_at   | 2.32 | Bmi1     | Bmi1 polycomb ring finger oncogene                                                 |
| 1424147_at   | 2.32 | Ahsa1    | AHA1, activator of heat shock protein ATPase homolog 1                             |
| 1433898_at   | 2.32 | N/A      | N/A                                                                                |
| 1433668_at   | 2.32 | Pnrc1    | proline-rich nuclear receptor coactivator 1                                        |
| 1424111_at   | 2.32 | Igf2r    | insulin-like growth factor 2 receptor                                              |
| 1434437_x_at | 2.32 | Rrm2     | ribonucleotide reductase M2                                                        |

|              |      |               |                                                                         |
|--------------|------|---------------|-------------------------------------------------------------------------|
| 1424043_at   | 2.31 | Ppil4         | peptidylprolyl isomerase (cyclophilin)-like 4                           |
| 1439345_at   | 2.31 | Gpnmb         | glycoprotein (transmembrane) nmb                                        |
| 1439463_x_at | 2.31 | LOC637733     | predicted gene, EG665056                                                |
| 1440339_at   | 2.31 | Enpp1         | ectonucleotide pyrophosphatase/phosphodiesterase 1                      |
| 1428252_at   | 2.31 | Chmp2b        | chromatin modifying protein 2B                                          |
| 1451971_at   | 2.30 | Cul4a         | cullin 4A                                                               |
| 1422449_s_at | 2.30 | Rcn2          | reticulocalbin 2                                                        |
| 1417478_a_at | 2.30 | Ppp2r3c       | protein phosphatase 2, regulatory subunit B'', gamma                    |
| 1434937_at   | 2.30 | Mycbp2        | MYC binding protein 2                                                   |
| 1415682_at   | 2.29 | Xpo7          | exportin 7                                                              |
| 1433755_at   | 2.29 | Mier1         | mesoderm induction early response 1 homolog                             |
| 1434317_s_at | 2.28 | Tex10         | testis expressed gene 10                                                |
| 1423266_at   | 2.28 | 2810405K02Rik | RIKEN cDNA 2810405K02 gene                                              |
| 1430404_at   | 2.27 | 4833416J08Rik | A kinase (PRKA) anchor protein 13                                       |
| 1426877_a_at | 2.26 | Pbrm1         | polybromo 1                                                             |
| 1451356_at   | 2.26 | Anp32e        | acidic (leucine-rich) nuclear phosphoprotein 32 family, member E        |
| 1437386_at   | 2.26 | Lingo1        | leucine rich repeat and Ig domain containing 1                          |
| 1434352_at   | 2.25 | B630005N14Rik | RIKEN cDNA B630005N14 gene                                              |
| 1416267_at   | 2.24 | Scoc          | short coiled-coil protein                                               |
| 1423069_at   | 2.24 | Adnp          | activity-dependent neuroprotective protein                              |
| 1418443_at   | 2.23 | Xpo1          | exportin 1, CRM1 homolog                                                |
| 1455031_at   | 2.22 | Cdc2l6        | cell division cycle 2-like 6 (CDK8-like)                                |
| 1459219_at   | 2.21 | Rapgef2       | Rap guanine nucleotide exchange factor (GEF) 2                          |
| 1456019_at   | 2.18 | Cwf19l2       | CWF19-like 2, cell cycle control                                        |
| 1448304_a_at | 2.18 | Rab6          | RAB6, member RAS oncogene family                                        |
| 1437892_at   | 2.17 | Zkscan3       | zinc finger with KRAB and SCAN domains 3                                |
| 1434928_at   | 2.17 | Gas2l1        | growth arrest-specific 2 like 1                                         |
| 1416637_at   | 2.16 | Slc4a2        | solute carrier family 4 (anion exchanger), member 2                     |
| 1436732_s_at | 2.16 | Fbxw8         | F-box and WD-40 domain protein 8                                        |
| 1458662_at   | 2.15 | Daam1         | RIKEN cDNA 1700008O03 gene                                              |
| 1453109_at   | 2.15 | Arsk          | arylsulfatase K                                                         |
| 1421910_at   | 2.15 | Tcf20         | transcription factor 20                                                 |
| 1416247_at   | 2.14 | Dctn3         | dynactin 3                                                              |
| 1454863_at   | 2.12 | Ankrd11       | ankyrin repeat domain 11                                                |
| 1417995_at   | 2.12 | Ptpn22        | protein tyrosine phosphatase, non-receptor type 22                      |
| 1418736_at   | 2.11 | B3galnt1      | UDP-GalNAc:betaGlcNAc beta 1,3-galactosaminyltransferase, polypeptide 1 |
| 1433740_at   | 2.10 | Tmem87b       | transmembrane protein 87B                                               |
| 1455312_at   | 2.09 | Phc3          | polyhomeotic-like 3                                                     |
| 1416477_at   | 2.08 | Ube2d2        | ubiquitin-conjugating enzyme E2D 2                                      |
| 1427134_at   | 2.08 | Sfrs12        | splicing factor, arginine/serine-rich 12                                |
| 1438769_a_at | 2.07 | Thyn1         | thymocyte nuclear protein 1                                             |
| 1425018_at   | 2.07 | Mcts1         | malignant T cell amplified sequence 1                                   |
| 1457069_at   | 2.06 | Ascc3         | activating signal cointegrator 1 complex subunit 3                      |
| 1428949_at   | 2.05 | Xpot          | exportin, tRNA (nuclear export receptor for tRNAs)                      |

|              |      |               |                                                                                                   |
|--------------|------|---------------|---------------------------------------------------------------------------------------------------|
| 1429588_at   | 2.04 | 2810474019Rik | RIKEN cDNA 2810474019 gene                                                                        |
| 1448509_at   | 2.04 | Fam107b       | family with sequence similarity 107, member B                                                     |
| 1422675_at   | 2.03 | Smarce1       | SWI/SNF related, matrix associated, actin dependent regulator of chromatin, subfamily e, member 1 |
| 1448398_s_at | 2.03 | Rpl22         | ribosomal protein L22                                                                             |
| 1435988_x_at | 2.02 | Ik            | IK cytokine                                                                                       |
| 1417390_at   | 2.02 | Gpn1          | GPN-loop GTPase 1                                                                                 |
| 1448215_a_at | 2.01 | Dpp3          | dipeptidylpeptidase 3                                                                             |
| 1421965_s_at | 2.01 | Notch3        | Notch gene homolog 3                                                                              |
| 1424842_a_at | 2.01 | Arhgap24      | Rho GTPase activating protein 24                                                                  |
| 1434014_at   | 2.01 | Atg4c         | autophagy-related 4C                                                                              |
| 1435347_at   | 1.99 | Stau1         | staufen (RNA binding protein) homolog 1                                                           |
| 1421077_at   | 1.99 | Sertad3       | SERTA domain containing 3                                                                         |
| 1428461_at   | 1.99 | Ppp2r5e       | protein phosphatase 2, regulatory subunit B (B56), epsilon isoform                                |
| 1436165_at   | 1.98 | Luc7l2        | LUC7-like 2                                                                                       |
| 1452895_at   | 1.98 | Fbxo45        | F-box protein 45                                                                                  |
| 1455728_at   | 1.98 | Pten          | phosphatase and tensin homolog                                                                    |
| 1456617_a_at | 1.97 | Eif2s2        | eukaryotic translation initiation factor 2, subunit 2                                             |
| 1436977_at   | 1.97 | N/A           | N/A                                                                                               |
| 1448527_at   | 1.97 | Pdcd10        | programmed cell death 10                                                                          |
| 1458414_at   | 1.96 | D2Ert93e      | DNA segment, Chr 2, ERATO Doi 93, expressed                                                       |
| 1420528_at   | 1.95 | Gpatch2       | G patch domain containing 2                                                                       |
| 1460615_at   | 1.95 | Nt5dc1        | 5'-nucleotidase domain containing 1                                                               |
| 1449085_at   | 1.95 | Phf10         | PHD finger protein 10                                                                             |
| 1431694_a_at | 1.95 | Ctnnbip1      | catenin beta interacting protein 1                                                                |
| 1416840_at   | 1.93 | Mid1ip1       | Mid1 interacting protein 1                                                                        |
| 1449694_s_at | 1.93 | Commd5        | COMM domain containing 5                                                                          |
| 1455432_at   | 1.92 | Taok1         | TAO kinase 1                                                                                      |
| 1434561_at   | 1.92 | Asxl1         | additional sex combs like 1                                                                       |
| 1426844_a_at | 1.92 | Pdcd2l        | programmed cell death 2-like                                                                      |
| 1416998_at   | 1.91 | Rrs1          | RRS1 ribosome biogenesis regulator homolog                                                        |
| 1427156_s_at | 1.88 | Ascc2         | activating signal cointegrator 1 complex subunit 2                                                |
| 1424389_at   | 1.86 | Nupl1         | nucleoporin like 1                                                                                |
| 1435389_at   | 1.86 | Reps2         | RALBP1 associated Eps domain containing protein 2                                                 |
| 1423167_at   | 1.86 | Mobk3         | MOB1, Mps One Binder kinase activator-like 3                                                      |
| 1453104_at   | 1.86 | Mapk1         | mitogen-activated protein kinase 1                                                                |
| 1455403_at   | 1.84 | Manea         | mannosidase, endo-alpha                                                                           |
| 1436346_at   | 1.82 | Cd109         | CD109 antigen                                                                                     |
| 1438771_at   | 1.81 | LOC100045983  | bromodomain containing 1                                                                          |
| 1455644_at   | 1.80 | Vps53         | vacuolar protein sorting 53                                                                       |
| 1424991_s_at | 1.80 | Tyms-ps       | thymidylate synthase                                                                              |
| 1441942_x_at | 1.80 | Snupn         | snurportin 1                                                                                      |
| 1427317_at   | 1.79 | Kin           | antigenic determinant of rec-A protein                                                            |
| 1428254_at   | 1.79 | Purb          | purine rich element binding protein B                                                             |
| 1426840_at   | 1.78 | Ythdf3        | YTH domain family 3                                                                               |



|              |       |               |                                                                   |
|--------------|-------|---------------|-------------------------------------------------------------------|
| 1453030_at   | 1.77  | Msl2          | male-specific lethal 2 homolog                                    |
| 1425542_a_at | 1.77  | Ppp2r5c       | protein phosphatase 2, regulatory subunit B (B56), gamma isoform  |
| 1416668_at   | 1.77  | Ttc35         | tetratricopeptide repeat domain 35                                |
| 1423385_at   | 1.75  | Actr8         | ARP8 actin-related protein 8 homolog                              |
| 1428144_at   | 1.74  | Lrwd1         | leucine-rich repeats and WD repeat domain containing 1            |
| 1448391_at   | 1.73  | Rab9          | RAB9, member RAS oncogene family                                  |
| 1416280_at   | 1.70  | Uba2          | ubiquitin-like modifier activating enzyme 2                       |
| 1418483_a_at | 1.66  | Ggta1         | glycoprotein galactosyltransferase alpha 1, 3                     |
| 1430221_at   | 1.64  | 9130008F23Rik |                                                                   |
| 1426625_at   | 1.63  | Zfp623        | zinc finger protein 623                                           |
| 1430805_s_at | 1.63  | Rmi1          | RMI1, RecQ mediated genome instability 1, homolog                 |
| 1452110_at   | 1.62  | Mtrr          | 5-methyltetrahydrofolate-homocysteine methyltransferase reductase |
| 1455465_at   | 1.62  | N/A           | N/A                                                               |
| 1415765_at   | 1.61  | Hnrnpul2      | heterogeneous nuclear ribonucleoprotein U-like 2                  |
| 1452262_at   | 1.60  | Grpel2        | GrpE-like 2, mitochondrial                                        |
| 1417305_at   | 1.59  | Speg          | SPEG complex locus                                                |
| 1433749_at   | 1.56  | Gna13         | guanine nucleotide binding protein, alpha 13                      |
| 1435169_at   | 1.55  | A930001N09Rik |                                                                   |
| 1423964_at   | 1.55  | Cpsf3l        | cleavage and polyadenylation specific factor 3-like               |
| 1457724_at   | 1.54  | Ctsl          | cathepsin L                                                       |
| 1416641_at   | 1.53  | Lig1          | ligase I, DNA, ATP-dependent                                      |
| 1449614_s_at | 1.52  | AI314976      | expressed sequence AI314976                                       |
| 1442004_at   | 1.51  | Trim65        | tripartite motif-containing 65                                    |
| 1434697_at   | 1.51  | Ddx6          | DEAD (Asp-Glu-Ala-Asp) box polypeptide 6                          |
| 1423465_at   | 1.50  | LOC100046401  | ferric-chelate reductase 1                                        |
| 1416768_at   | 1.45  | 1110003E01Rik | RIKEN cDNA 1110003E01 gene                                        |
| 1454195_at   | 1.38  | 4933433G19Rik |                                                                   |
| 1453412_a_at | 1.36  | Sec14l1       | SEC14-like 1 ( <i>S. cerevisiae</i> )                             |
| 1454837_at   | 1.36  | Cln6          | ceroid-lipofuscinosis, neuronal 6                                 |
| 1451310_a_at | 1.12  | Ctsl          | cathepsin L                                                       |
| 1448513_a_at | 1.05  | Npc2          | Niemann Pick type C2                                              |
| 1436928_s_at | -1.32 | Adcy3         | adenylate cyclase 3                                               |
| 1435452_at   | -1.37 | Tmem20        | transmembrane protein 20                                          |
| 1426166_at   | -1.37 | Mup5          | major urinary protein 5                                           |
| 1443177_at   | -1.38 | N/A           | N/A                                                               |
| 1419970_at   | -1.38 | Slc35a5       | solute carrier family 35, member A5                               |
| 1436425_at   | -1.39 | Kank4         | KN motif and ankyrin repeat domains 4                             |
| 1421472_at   | -1.40 | 2900083I11Rik | RIKEN cDNA 2900083I11 gene                                        |
| 1427713_x_at | -1.40 | Pou2f2        | POU domain, class 2, transcription factor 2                       |
| 1439025_at   | -1.45 | Zfp446        | zinc finger protein 446                                           |
| 1459247_at   | -1.45 | Agbl3         | ATP/GTP binding protein-like 3                                    |
| 1445662_x_at | -1.47 | N/A           | N/A                                                               |
| 1459182_at   | -1.51 | N/A           | N/A                                                               |
| 1450176_at   | -1.51 | Ern1          | endoplasmic reticulum (ER) to nucleus signalling 1                |

|              |       |               |                                                                           |
|--------------|-------|---------------|---------------------------------------------------------------------------|
| 1446354_at   | -1.53 | C130098B18Rik | RIKEN cDNA C130098B18 gene                                                |
| 1429560_at   | -1.53 | 100043468     | predicted gene, 100043468                                                 |
| 1440722_at   | -1.55 | D19Erttd386e  |                                                                           |
| 1459324_at   | -1.58 | Fermt2        | fermitin family homolog 2                                                 |
| 1419214_at   | -1.59 | Tnfrsf11a     | tumor necrosis factor receptor superfamily, member 11a                    |
| 1438529_at   | -1.60 | Tmem201       | transmembrane protein 201                                                 |
| 1445175_at   | -1.61 | 100042940     | predicted gene, 100042940                                                 |
| 1443785_x_at | -1.62 | Pdlim7        | PDZ and LIM domain 7                                                      |
| 1433099_at   | -1.63 | 4933428L12Rik | RIKEN cDNA 4933428L12 gene                                                |
| 1452764_at   | -1.65 | Socs6         | suppressor of cytokine signaling 6                                        |
| 1454294_at   | -1.66 | 2310061A09Rik | RIKEN cDNA 2310061A09 gene                                                |
| 1432156_a_at | -1.66 | Rnf32         | ring finger protein 32                                                    |
| 1458747_at   | -1.66 | Fbxo45        | F-box protein 45                                                          |
| 1432260_at   | -1.67 | Gpr39         | G protein-coupled receptor 39                                             |
| 1448000_at   | -1.70 | Cdca3         | cell division cycle associated 3                                          |
| 1459307_at   | -1.71 | N/A           | N/A                                                                       |
| 1432875_at   | -1.72 | 4632409D06Rik | RIKEN cDNA 4632409D06 gene                                                |
| 1455961_at   | -1.72 | Mme           | membrane metallo endopeptidase                                            |
| 1447884_x_at | -1.73 | Fam134c       | family with sequence similarity 134, member C                             |
| 1458661_at   | -1.73 | N/A           | N/A                                                                       |
| 1430137_at   | -1.74 | 1300002E11Rik | RIKEN cDNA 1300002E11 gene                                                |
| 1439515_at   | -1.75 | Setd5         | SET domain containing 5                                                   |
| 1456045_at   | -1.76 | 1700106N22Rik | RIKEN cDNA 1700106N22 gene                                                |
| 1439339_at   | -1.76 | N/A           | N/A                                                                       |
| 1447789_x_at | -1.77 | Ddx6          | DEAD (Asp-Glu-Ala-Asp) box polypeptide 6                                  |
| 1436267_a_at | -1.78 | Frap1         | FK506 binding protein 12-rapamycin associated protein 1                   |
| 1441626_at   | -1.78 | N/A           | N/A                                                                       |
| 1435627_x_at | -1.79 | N/A           | N/A                                                                       |
| 1423224_at   | -1.82 | Tctn2         | tectonic family member 2                                                  |
| 1443719_x_at | -1.82 | Ddx42         | DEAD (Asp-Glu-Ala-Asp) box polypeptide 42                                 |
| 1437594_x_at | -1.83 | Pigt          | phosphatidylinositol glycan anchor biosynthesis, class T                  |
| 1457639_at   | -1.83 | Atp6v1h       | V-ATPase subunit H                                                        |
| 1430996_at   | -1.85 | Etnk1         | ethanolamine kinase 1                                                     |
| 1420769_at   | -1.86 | Dhx58         | DEXH (Asp-Glu-X-His) box polypeptide 58                                   |
| 1425901_at   | -1.87 | Nfatc2        | nuclear factor of activated T-cells, cytoplasmic, calcineurin-dependent 2 |
| 1447377_at   | -1.87 | Gm428         |                                                                           |
| 1453090_x_at | -1.88 | N/A           | N/A                                                                       |
| 1421990_at   | -1.90 | Syt1          | synaptotagmin I                                                           |
| 1452920_a_at | -1.96 | Ppil2         | peptidylprolyl isomerase (cyclophilin)-like 2                             |
| 1423953_at   | -1.96 | Cdkal1        | CDK5 regulatory subunit associated protein 1-like 1                       |
| 1432711_at   | -1.96 | 4933425M03Rik |                                                                           |
| 1457629_at   | -1.97 | Atmin         | ATM interactor                                                            |
| 1415748_a_at | -1.97 | Dctn5         | polo-like kinase 1                                                        |
| 1430358_at   | -1.99 | Becn1         | beclin 1                                                                  |
| 1430373_at   | -1.99 | 5430427O19Rik | RIKEN cDNA 5430427O19 gene                                                |

|              |       |               |                                                                |
|--------------|-------|---------------|----------------------------------------------------------------|
| 1447820_x_at | -2.00 | Cpt2          | carnitine palmitoyltransferase 2                               |
| 1437762_at   | -2.04 | Rab39         | RAB39, member RAS oncogene family                              |
| 1416787_at   | -2.07 | Acvr1         | activin A receptor, type 1                                     |
| 1446422_at   | -2.12 | A530081L18Rik | membrane-associated ring finger (C3HC4) 3                      |
| 1447267_at   | -2.14 | C85319        | expressed sequence C85319                                      |
| 1454219_at   | -2.15 | Dnajc2        | DnaJ (Hsp40) homolog, subfamily C, member 2                    |
| 1430772_at   | -2.22 | 4932438H23Rik | RIKEN cDNA 4932438H23 gene                                     |
| 1447768_at   | -2.24 | Got2          | glutamate oxaloacetate transaminase 2, mitochondrial           |
| 1446001_at   | -2.25 | N/A           | N/A                                                            |
| 1442954_at   | -2.33 | N/A           | N/A                                                            |
| 1444873_at   | -2.35 | Hip1          | huntingtin interacting protein 1                               |
| 1424595_at   | -2.37 | F11r          | F11 receptor                                                   |
| 1455284_x_at | -2.41 | Pigx          | phosphatidylinositol glycan anchor biosynthesis, class X       |
| 1420948_s_at | -2.42 | Atrx          | alpha thalassemia/mental retardation syndrome X-linked homolog |
| 1441784_at   | -2.46 | N/A           | N/A                                                            |
| 1446211_at   | -2.55 | ErbB4         | v-erb-a erythroblastic leukemia viral oncogene homolog 4       |
| 1433020_at   | -2.65 | 5830413G11Rik | RIKEN cDNA 5830413G11 gene                                     |
| 1456808_at   | -2.68 | 4933426M11Rik | RIKEN cDNA 4933426M11 gene                                     |
| 1453534_at   | -2.71 | 2810004I08Rik |                                                                |
| 1446004_at   | -2.95 | N/A           | N/A                                                            |
| 1452240_at   | -3.25 | Brunol4       | bruno-like 4, RNA binding protein                              |
